# Supplementary material for: Integrating Extrinsic and Intrinsic Cues into a Minimal Model of Lineage Commitment for Hematopoietic Progenitors
Source: PubMed Central journal article supplement (PMC2736398; doi:10.1371/journal.pcbi.1000518), 2009-09-25

**Figure S1:** Effect of positive feedback loops on the steady-state level of  $ATF_B$  for different levels of transcriptional cross-antagonism

Strengths of the autofeedback loops ( $F_{1A}$  and  $F_{1B}$ ) are varied for both lineages and the steady-state values of  $ATF_B$  are plotted for no (A), moderate (C) and strong (E) inhibition, keeping the strength of receptor feedback ( $F_{2A}$  and  $F_{2B}$ ) constant.

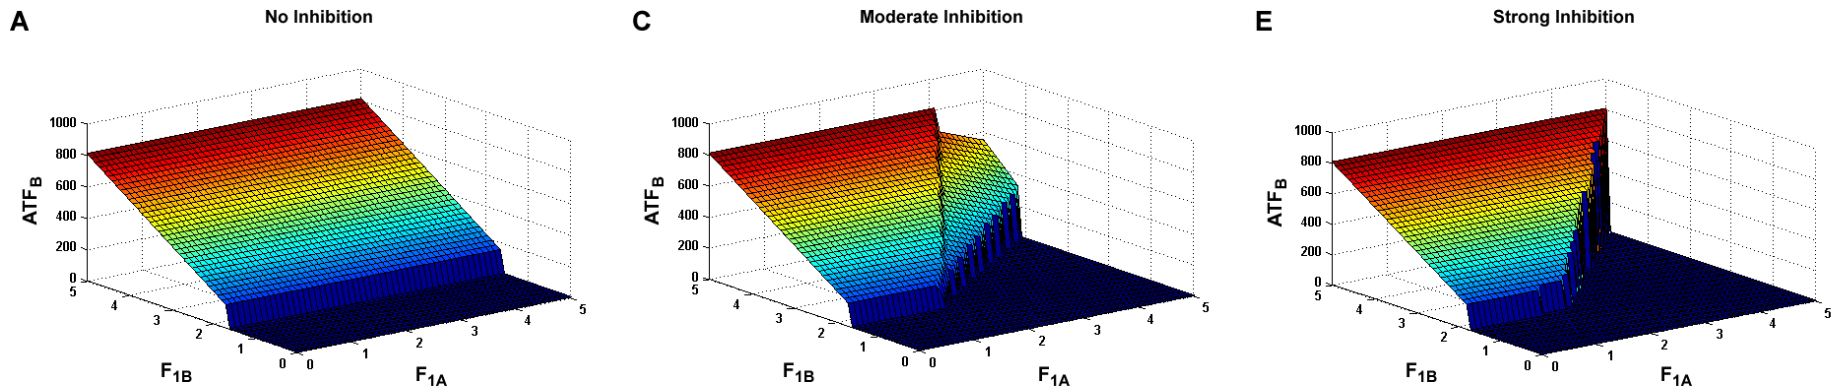

Strengths of the receptor feedback loops ( $F_{2A}$  and  $F_{2B}$ ) are varied and the values of  $ATF_B$  are plotted for no (B), moderate (D) and strong (F) inhibition, keeping the strength of autofeedback ( $F_{1A}$  and  $F_{1B}$ ) constant.

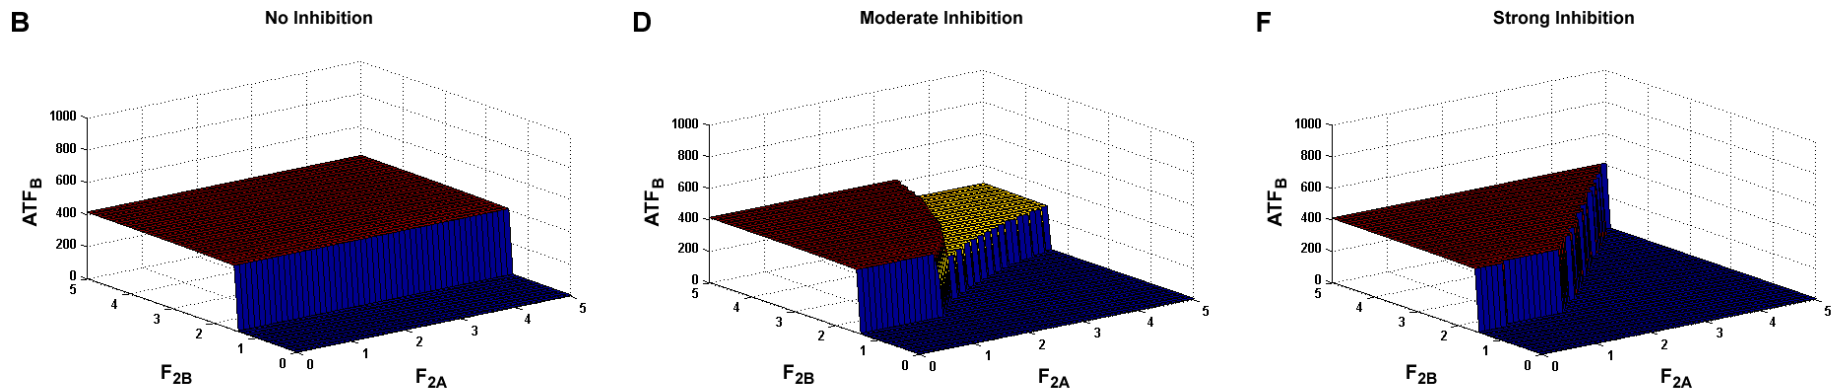

Supplement: pcbi.1000518.s002.pdf [file pcbi.1000518.s002.pdf]
