# Supplementary material for: Integrating Extrinsic and Intrinsic Cues into a Minimal Model of Lineage Commitment for Hematopoietic Progenitors
Source: PubMed Central journal article supplement (PMC2736398; doi:10.1371/journal.pcbi.1000518), 2009-09-25
Supplement: pcbi.1000518.s003.pdf [file pcbi.1000518.s003.pdf]

**Table S1:** Differential equations for the deterministic model

$$\frac{d(R_A)}{dt} = B_A^R - kdegR_A * R_A - kon_A * L_A * R_A + koff_A * C_A + \frac{F_{2A} * ATF_A}{K_{DA} * \left[1 + \frac{ATF_B}{K_B}\right] + ATF_A}$$

$$\frac{d(C_A)}{dt} = kon_A * L_A * R_A - koff_A * C_A - ke_A * C_A$$

$$\frac{d(ITF_A)}{dt} = B_A^{ITF} - kdegTF_A * ITF_A - \frac{k_{1A} * C_A * ITF_A}{K_{M1A} + ITF_A} + \frac{k_{2A} * P_A * ATF_A}{K_{M2A} + ATF_A} + \frac{F_{1A} * ATF_A}{K_{DA} * \left[1 + \frac{ATF_B}{K_B}\right] + ATF_A}$$

$$\frac{d(ATF_A)}{dt} = \frac{k_{1A} * C_A * ITF_A}{K_{M1A} + ITF_A} - \frac{k_{2A} * P_A * ATF_A}{K_{M2A} + ATF_A} - kdegTF_A * ATF_A$$

$$\frac{d(R_B)}{dt} = B_B^R - kdegR_B * R_B - kon_B * L_B * R_B + koff_B * C_B + \frac{F_{2B} * ATF_B}{K_{DB} * \left[1 + \frac{ATF_A}{K_A}\right] + ATF_B}$$

$$\frac{d(C_B)}{dt} = kon_B * L_B * R_B - koff_B * C_B - ke_B * C_B$$

$$\frac{d(ITF_B)}{dt} = B_B^{ITF} - kdegTF_B * ITF_B - \frac{k_{1B} * C_B * ITF_B}{K_{M1B} + ITF_B} + \frac{k_{2B} * P_B * ATF_B}{K_{M2B} + ATF_B} + \frac{F_{1B} * ATF_B}{K_{DB} * \left[1 + \frac{ATF_A}{K_A}\right] + ATF_B}$$

$$\frac{d(ATF_B)}{dt} = \frac{k_{1B} * C_B * ITF_B}{K_{M1B} + ITF_B} - \frac{k_{2B} * P_B * ATF_B}{K_{M2B} + ATF_B} - kdegTF_B * ATF_B$$

$L_A$  : Ligand for lineage A (constant)

$R_A$  : Lineage-specific receptor for the A lineage

$C_A$  : Ligand-receptor complex for the A lineage

$ITF_A$  : Lineage-specific inactive transcription factor for the A lineage

$ATF_A$  : Active transcription factor for the A lineage

$P_A$  : Phosphatase deactivating  $ATF_A$  (constant)

$L_B$  : Ligand for lineage B (constant)

$R_B$  : Lineage-specific receptor for the B lineage

$C_B$  : Ligand-receptor complex for the B lineage

$ITF_B$  : Lineage-specific inactive transcription factor for the B lineage

$ATF_B$  : Active transcription factor for the B lineage

$P_B$  : Phosphatase deactivating  $ATF_B$  (constant)
