# Supplementary material for: Integrating Extrinsic and Intrinsic Cues into a Minimal Model of Lineage Commitment for Hematopoietic Progenitors
Source: PubMed Central journal article supplement (PMC2736398; doi:10.1371/journal.pcbi.1000518), 2009-09-25
Supplement: pcbi.1000518.s006.pdf [file pcbi.1000518.s006.pdf]

**Table S4: Parameter fitting of microarray data**

Cell samples collected from FDCP-mix cells that were induced to differentiate along neutrophil, erythrocyte, and megakaryocyte lineages are inherently heterogeneous (Bruno, 2004). To overcome the problem of analyzing aggregate microarray data from these samples, we performed a simple deconvolution by generating a weighting function to account for the non-uniform contribution from each sub-population to the average signal. This is possible since the population fractions at each time point for each sample were previously determined (Bruno, 2004). The weighted parameters ( $wX_i$ ) were obtained from a global fit to the microarray data for all time points across all experiments using a least squares approach and are listed in the table below.

Weighting function:

$$wB_i \times fB + wN_i \times fN + wEb_i \times fEb + wEr_i \times fEr + wMi \times fM$$

B – blast (CMP)

N – neutrophil

Eb – erythroblast

Er – erythrocyte

M – megakaryocyte

$wB_i$  – contribution of blasts to the expression of gene  $i$

$fB$  – fraction of blasts in the population

$wN_i$  – contribution of neutrophils to the expression of gene  $i$

$fN$  – fraction of neutrophils in the population

$wEb_i$  – contribution of erythroblasts to the expression of gene  $i$

$fEb$  – fraction of erythroblasts in the population

$wEr_i$  – contribution of erythrocytes to the expression of gene  $i$

$fEr$  – fraction of erythrocytes in the population

$wMi$  – contribution of megakaryocytes to the expression of gene  $i$

$fM$  – fraction of megakaryocytes in the population

**Fitted coefficients (wXi) from three independent microarray experiments:**

| <b>GENE</b>  | <b>Blast</b> | <b>Neutrophil</b> | <b>Erythroblast</b> | <b>Erythrocyte</b> | <b>Megakaryocyte</b> |
|--------------|--------------|-------------------|---------------------|--------------------|----------------------|
| <b>PU.1</b>  | 1.000        | 4.009             | 0.379               | 0.250              | 0.000                |
| <b>GATA1</b> | 1.000        | 0.693             | 4.233               | 1.801              | 1.414                |
| <b>EPOR</b>  | 1.000        | 0.837             | 3.021               | 2.028              | 2.014                |
| <b>TPOR</b>  | 1.000        | 0.967             | 1.679               | 1.317              | 4.875                |
| <b>GCSFR</b> | 1.000        | 10.425            | 0.000               | 0.644              | 0.000                |

| <b>GENE</b>  | <b>Blast</b> | <b>Neutrophil</b> | <b>Erythroblast</b> | <b>Erythrocyte</b> | <b>Megakaryocyte</b> |
|--------------|--------------|-------------------|---------------------|--------------------|----------------------|
| <b>PU.1</b>  | 1.104        | 4.071             | 0.323               | 0.383              | 0.000                |
| <b>GATA1</b> | 1.172        | 0.754             | 4.464               | 2.111              | 1.545                |
| <b>EPOR</b>  | 1.092        | 0.906             | 3.311               | 2.187              | 1.979                |
| <b>TPOR</b>  | 1.133        | 1.240             | 1.477               | 1.822              | 5.662                |
| <b>GCSFR</b> | 1.071        | 11.875            | 0.503               | 0.377              | 0.000                |

| <b>GENE</b>  | <b>Blast</b> | <b>Neutrophil</b> | <b>Erythroblast</b> | <b>Erythrocyte</b> | <b>Megakaryocyte</b> |
|--------------|--------------|-------------------|---------------------|--------------------|----------------------|
| <b>PU.1</b>  | 0.896        | 3.947             | 0.434               | 0.118              | 0.000                |
| <b>GATA1</b> | 0.828        | 0.631             | 4.001               | 1.491              | 1.283                |
| <b>EPOR</b>  | 0.908        | 0.769             | 2.731               | 1.869              | 2.048                |
| <b>TPOR</b>  | 0.867        | 0.694             | 1.881               | 0.812              | 4.088                |
| <b>GCSFR</b> | 0.929        | 8.964             | 0.000               | 0.626              | 0.000                |

The kinetic expression profile of each gene for each lineage was then obtained by only considering blasts and the cells that are pertinent to the lineage of interest.

For erythrocytes: blasts, erythroblasts and erythrocytes

For megakaryocytes: blasts and megakaryocytes

For neutrophils: blasts and neutrophils

After removing the fractional contribution of cells from other lineages, the remaining populations were normalized to obtain a total fraction of 1.

**Reference:**

Bruno L, Hoffmann R, McBlane F, Brown J, Gupta R, et al. (2004) Molecular signatures of self-renewal, differentiation, and lineage choice in multipotential hemopoietic progenitor cells *in vitro*. *Mol Cell Biol* 24: 741-756.
