# Supplementary material for: Integrating Extrinsic and Intrinsic Cues into a Minimal Model of Lineage Commitment for Hematopoietic Progenitors
Source: PLoS Comput Biol. 2009 Sep 25;5(9):e1000518. doi: 10.1371/journal.pcbi.1000518 (PMC2736398; doi:10.1371/journal.pcbi.1000518)
Supplement: Table S2 — Rate constants and initial conditions for the deterministic and stochastic models (0.08 MB PDF) [file pcbi.1000518.s004.pdf]

**Table S2:** Rate constants and initial conditions for the deterministic and stochastic models

| Rate constant | Value                                           | Description                                                  |
|---------------|-------------------------------------------------|--------------------------------------------------------------|
| $B_A^R$       | 0.05 molecules/min                              | Basal synthesis rate of $R_A$                                |
| $kdegR_A$     | $0.005 \text{ min}^{-1}$                        | Degradation rate of $R_A$                                    |
| $kon_A$       | $0.001 \text{ molecules}^{-1} \text{ min}^{-1}$ | Association rate constant for $L_A$ and $R_A$ binding        |
| $koff_A$      | $0.05 \text{ min}^{-1}$                         | Dissociation rate constant for $L_A$ and $R_A$ binding       |
| $ke_A$        | $0.01 \text{ min}^{-1}$                         | Endocytic rate constant for $C_A$                            |
| $B_A^{ITF}$   | 0.05 molecules/min                              | Basal synthesis rate of $ITF_A$                              |
| $kdegTF_A$    | $0.005 \text{ min}^{-1}$                        | Degradation rate of $ITF_A$ and $ATF_A$                      |
| $k_{IA}$      | $60 \text{ min}^{-1}$                           | Rate of activation of $ITF_A$                                |
| $K_{M1A}$     | 100 molecules                                   | Michaelis constant for activation of $ITF_A$                 |
| $K_{2A}$      | $30 \text{ min}^{-1}$                           | Rate of deactivation of $ATF_A$                              |
| $K_{M2A}$     | 30 molecules                                    | Michaelis constant for deactivation of $ATF_A$               |
| $F_{1A}$      | 3 molecules/min                                 | Strength of transcription factor feedback for lineage A      |
| $F_{2A}$      | 3 molecules/min                                 | Strength of receptor feedback for lineage A                  |
| $K_{DA}$      | 200 molecules                                   | Equilibrium dissociation constant for $ATF_A$ binding to DNA |
| $K_{IB}$      | 400 molecules                                   | Inhibitor dissociation constant (effect of B on A)           |
| $B_B^R$       | 0.05 molecules/min                              | Basal synthesis rate of $R_B$                                |
| $kdegR_B$     | $0.005 \text{ min}^{-1}$                        | Degradation rate of $R_B$                                    |
| $kon_B$       | $0.001 \text{ molecules}^{-1} \text{ min}^{-1}$ | Association rate constant for $L_B$ and $R_B$ binding        |
| $koff_B$      | $0.05 \text{ min}^{-1}$                         | Dissociation rate constant for $L_B$ and $R_B$ binding       |
| $ke_B$        | $0.01 \text{ min}^{-1}$                         | Endocytic rate constant for $C_B$                            |
| $B_B^{ITF}$   | 0.05 molecules/min                              | Basal synthesis rate of $ITF_B$                              |
| $kdegTF_B$    | $0.005 \text{ min}^{-1}$                        | Degradation rate of $ITF_B$ and $ATF_B$                      |
| $k_{IB}$      | $60 \text{ min}^{-1}$                           | Rate of activation of $ITF_B$                                |
| $K_{M1B}$     | 100 molecules                                   | Michaelis constant for activation of $ITF_B$                 |
| $K_{2B}$      | $30 \text{ min}^{-1}$                           | Rate of deactivation of $ATF_B$                              |
| $K_{M2B}$     | 30 molecules                                    | Michaelis constant for deactivation of $ATF_B$               |
| $F_{1B}$      | 3 molecules/min                                 | Strength of transcription factor feedback for lineage B      |
| $F_{2B}$      | 3 molecules/min                                 | Strength of receptor feedback for lineage B                  |
| $K_{DB}$      | 200 molecules                                   | Equilibrium dissociation constant for $ATF_B$ binding to DNA |
| $K_{IA}$      | 400 molecules                                   | Inhibitor dissociation constant (effect of A on B)           |

Phosphatases  $P_A$  and  $P_B$  are held constant at 15 molecules for all simulations.

Initial conditions when starting from the uncommitted or off-state (in molecules):

$[R_A]_0 = 10$ ;  $[R_B]_0 = 10$ ;  $[C_A]_0 = 0$ ;  $[C_B]_0 = 0$ ;  $[ITF_A]_0 = 10$ ;  $[ITF_B]_0 = 10$ ;  $[ATF_A]_0 = 0$ ;  $[ATF_B]_0 = 0$

Initial conditions when starting from the bipotent or intermediate state (in molecules):

$[R_A]_0 = 30$ ;  $[R_B]_0 = 30$ ;  $[C_A]_0 = 125$ ;  $[C_B]_0 = 125$ ;  $[ITF_A]_0 = 6$ ;  $[ITF_B]_0 = 6$ ;  $[ATF_A]_0 = 273$ ;  $[ATF_B]_0 = 273$
