# Supplementary material for: Integrating Extrinsic and Intrinsic Cues into a Minimal Model of Lineage Commitment for Hematopoietic Progenitors
Source: PLoS Comput Biol. 2009 Sep 25;5(9):e1000518. doi: 10.1371/journal.pcbi.1000518 (PMC2736398; doi:10.1371/journal.pcbi.1000518)
Supplement: Table S3 — Probability functions and reactions for the stochastic model (0.04 MB PDF) [file pcbi.1000518.s005.pdf]

**Table S3** : Probability functions and reactions for the stochastic model

|                                 |                                                                                          |                                    |                                                                                          |
|---------------------------------|------------------------------------------------------------------------------------------|------------------------------------|------------------------------------------------------------------------------------------|
| $\xrightarrow{R_1} R_A$         | $P_1 = B_A^R$                                                                            | $\xrightarrow{R_3} R_B$            | $P_{13} = B_B^R$                                                                         |
| $R_A \xrightarrow{P_2}$         | $P_2 = kdegR_A * R_A$                                                                    | $R_B \xrightarrow{R_4}$            | $P_{14} = kdegR_B * R_B$                                                                 |
| $R_A \xrightarrow{P_3} C_A$     | $P_3 = kon_A * L_A * R_A$                                                                | $R_B \xrightarrow{P_{15}} C_B$     | $P_{15} = kon_B * L_B * R_B$                                                             |
| $C_A \xrightarrow{P_4} R_A$     | $P_4 = koff_A * C_A$                                                                     | $C_B \xrightarrow{R_6} R_B$        | $P_{16} = koff_B * C_B$                                                                  |
| $C_A \xrightarrow{P_5}$         | $P_5 = ke_A * C_A$                                                                       | $C_B \xrightarrow{R_7}$            | $P_{17} = ke_B * C_B$                                                                    |
| $\xrightarrow{P_6} ITF_A$       | $P_6 = B_A^{ITF}$                                                                        | $\xrightarrow{R_8} ITF_B$          | $P_{18} = B_B^{ITF}$                                                                     |
| $ITF_A \xrightarrow{P_7}$       | $P_7 = kdegTF_A * ITF_A$                                                                 | $ITF_B \xrightarrow{R_9}$          | $P_{19} = kdegTF_B * ITF_B$                                                              |
| $ITF_A \xrightarrow{P_8} ATF_A$ | $P_8 = \frac{k_{1A} * C_A * ITF_A}{K_{M1A} + ITF_A}$                                     | $ITF_B \xrightarrow{P_{20}} ATF_B$ | $P_{20} = \frac{k_{1B} * C_B * ITF_B}{K_{M1B} + ITF_B}$                                  |
| $ATF_A \xrightarrow{P_9} ITF_A$ | $P_9 = \frac{k_{2A} * P_A * ATF_A}{K_{M2A} + ATF_A}$                                     | $ATF_B \xrightarrow{P_{21}} ITF_B$ | $P_{21} = \frac{k_{2B} * P_B * ATF_B}{K_{M2B} + ATF_B}$                                  |
| $ATF_A \xrightarrow{P_{10}}$    | $P_{10} = kdegTF_A * ATF_A$                                                              | $ATF_B \xrightarrow{P_{22}}$       | $P_{22} = kdegTF_B * ATF_B$                                                              |
| $\xrightarrow{P_{11}} R_A$      | $P_{11} = \frac{F_{2A} * ATF_A}{K_{DA} * \left[1 + \frac{ATF_B}{K_{LB}}\right] + ATF_A}$ | $\xrightarrow{P_{23}} R_B$         | $P_{23} = \frac{F_{2B} * ATF_B}{K_{DB} * \left[1 + \frac{ATF_A}{K_{LA}}\right] + ATF_B}$ |
| $\xrightarrow{P_{12}} ITF_A$    | $P_{12} = \frac{F_{1A} * ATF_A}{K_{DA} * \left[1 + \frac{ATF_B}{K_{LB}}\right] + ATF_A}$ | $\xrightarrow{P_{24}} ITF_B$       | $P_{24} = \frac{F_{1B} * ATF_B}{K_{DB} * \left[1 + \frac{ATF_A}{K_{LA}}\right] + ATF_B}$ |
